# Supplementary material
Source: PubMed Central journal article supplement (PMC4191049)
Supplement: JCI71245sd.pdf [file JCI71245sd.pdf]

## Supplemental Figure S1

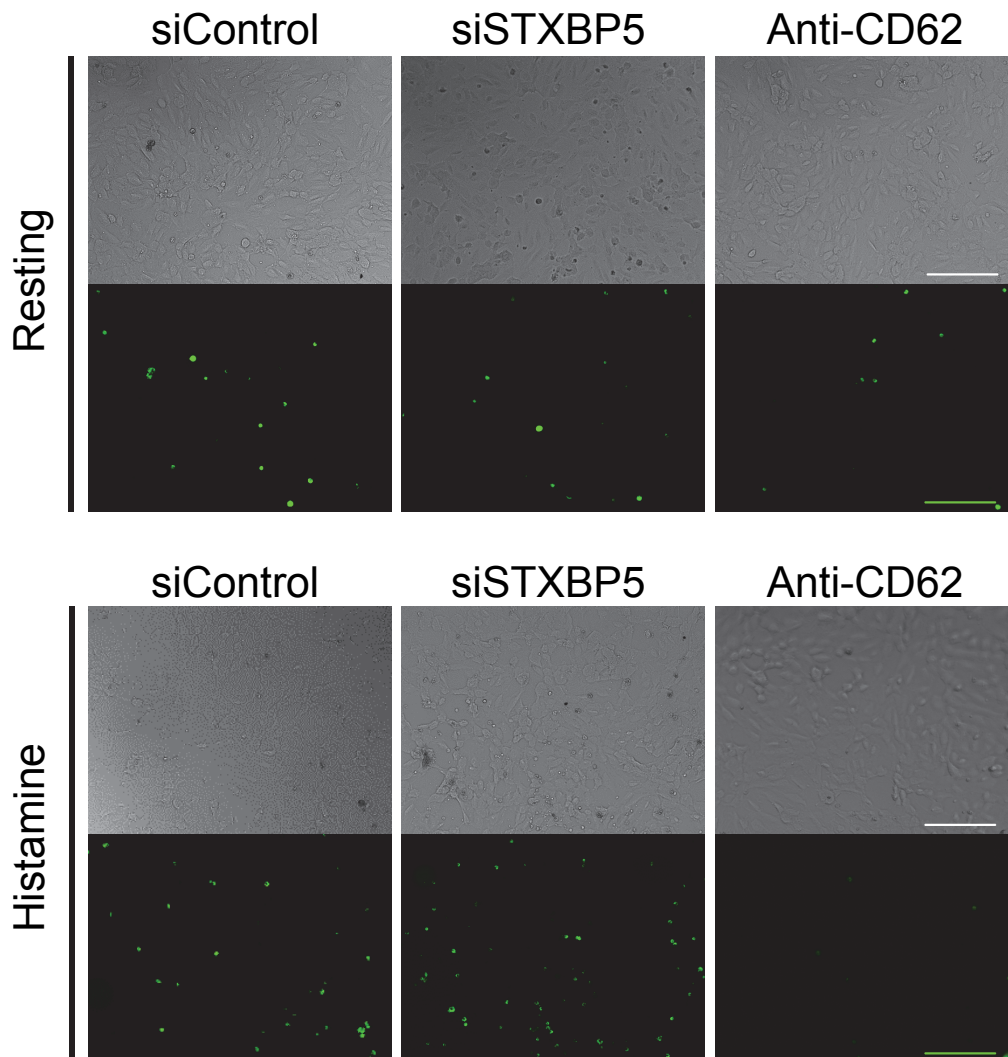

Supplemental Figure S1. Knockdown of STXBP5 in HUVEC increases P-selectin externalization as measured by HL-60 cell adherence after 10  $\mu$ M histamine stimulation. HL-60 cells were labeled with calcein AM to allow visualization by a fluorescent microscope. HUVEC treated with an antibody to full-length P-selectin (Anti-CD62) serve as a negative control. Shown are representative bright-field and corresponding fluorescent images from multiple fields from 3 wells per transfection per treatment (10  $\times$  water immersion lens; scale bar = 150  $\mu$ m).

## Supplemental Figure S2

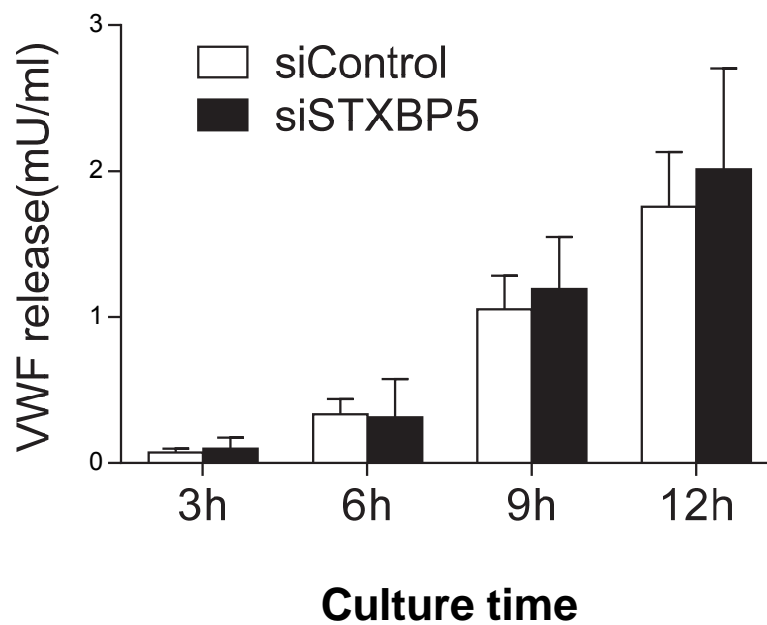

Supplemental Figure S2. STXBP5 and constitutive release of VWF. Constitutive release of VWF was measured in 3-h intervals over 12 h in resting HUVEC that were transfected with control siRNA or STXBP5 siRNA for 72 hours ( $n = 3 \pm$  S.D. No significant difference between siControl and siSTXBP5 were detected).

## Supplemental Figure S3

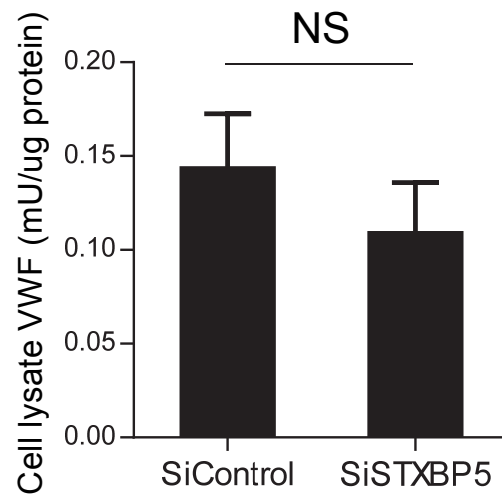

Supplemental Figure S3. STXBP5 does not affect HUVEC content of VWF. Total protein content in lysates of HUVEC transfected with siControl or siSTXBP5 was measured and normalized by bicinchoninic acid assay, and lysates contain 1  $\mu$ g total protein were measured VWF content by ELISA ( $n = 4 \pm$  S.D. No significant difference was detected).

## Supplemental Figure S4

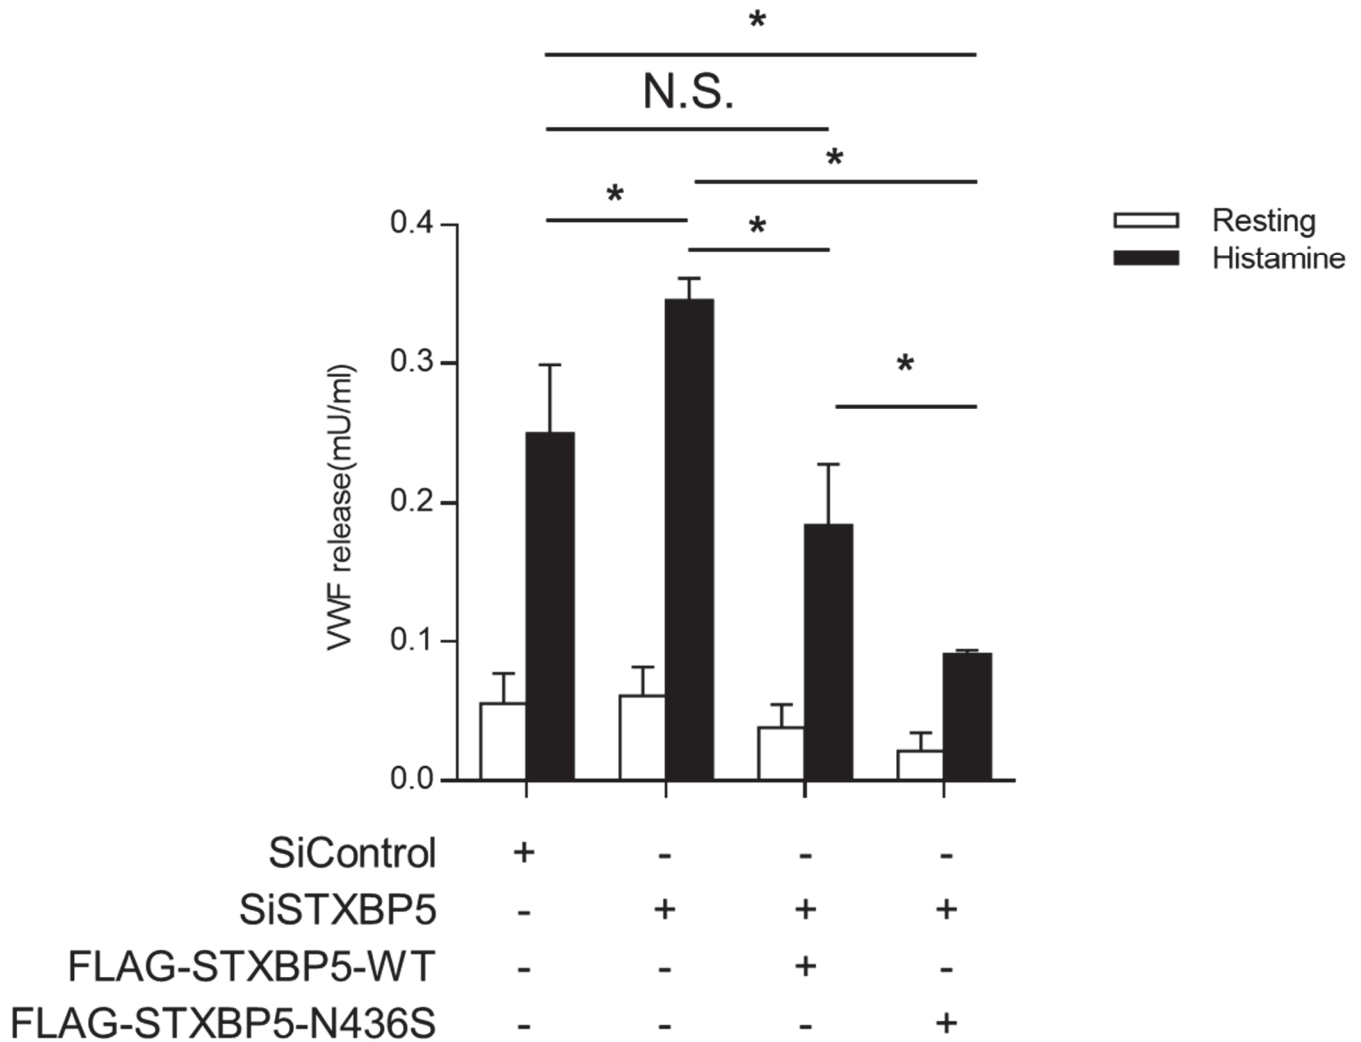

Supplemental Figure S4. STXBP5 SNP and release of VWF. HUVEC were transfected with siSTXBP5 to knock down endogenous STXBP5 expression, and some co-transfected with an expression vector for Stxbp5(WT) or Stxbp5(N436S). Release of VWF was measured after treatment with media or histamine (n = 4 ± S.D. \* P<0.05).



## Supplemental Figure S5

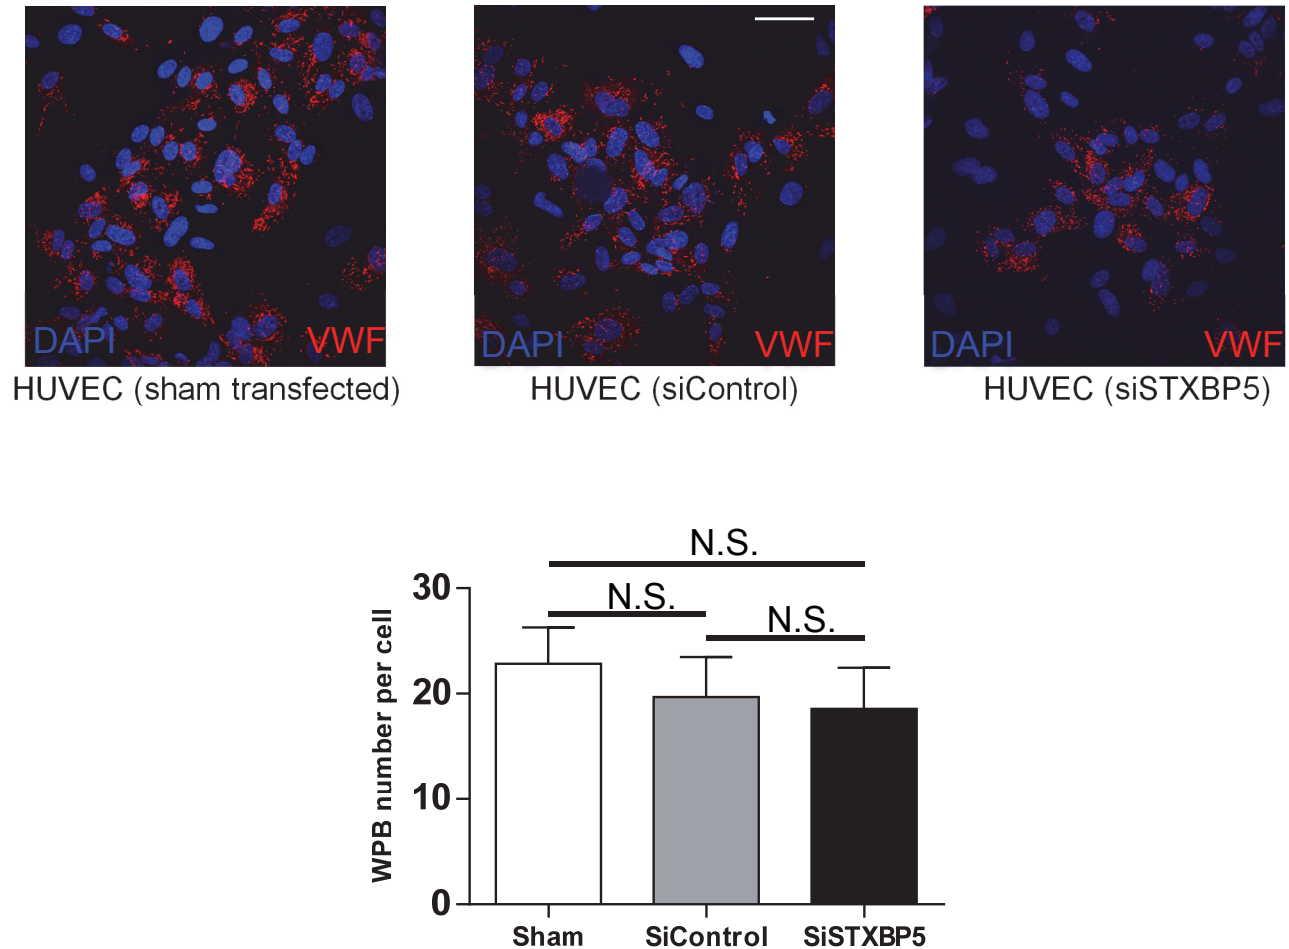

Supplemental Figure S5. Knockdown of STXBP5 does not affect the number of WPB granules per cell. HUVEC were transfected with siSTXBP5 or siControl, or sham transfected, and the number of WPB was counted by ImagePro Plus ( $n = 3$  replicate plates  $\pm$  S.D.; granules were counted in over 240 cells per plate. No significant difference were detected by one way ANOVA. Scale bar = 50  $\mu$ m).

## Supplemental Figure S6

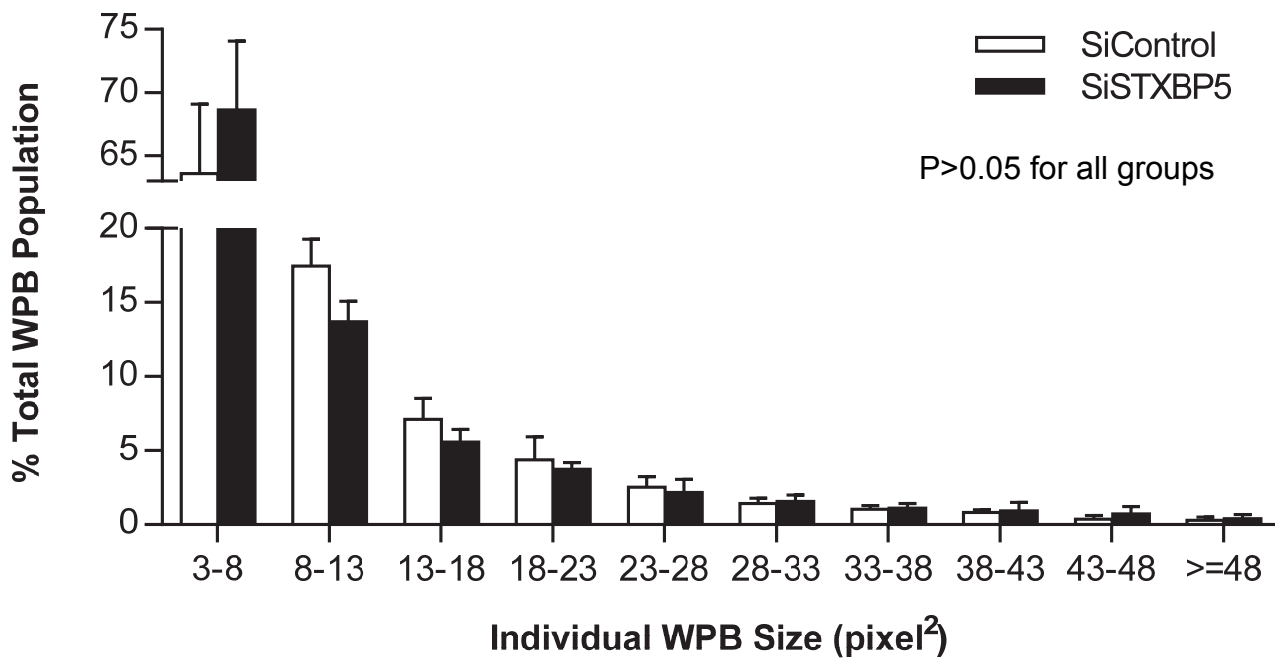

Supplemental Figure S6. Knockdown of STXBP5 does not affect the size of WPB granules. HUVEC were transfected with siSTXBP5 or siControl, and the size of individual WPB was measured by ImagePro Plus (n = 3 replicate plates  $\pm$  S.D.; granules were counted in over 240 cells per plate. No significant difference between siControl and siSTXBP5).

## Supplemental Figure S7

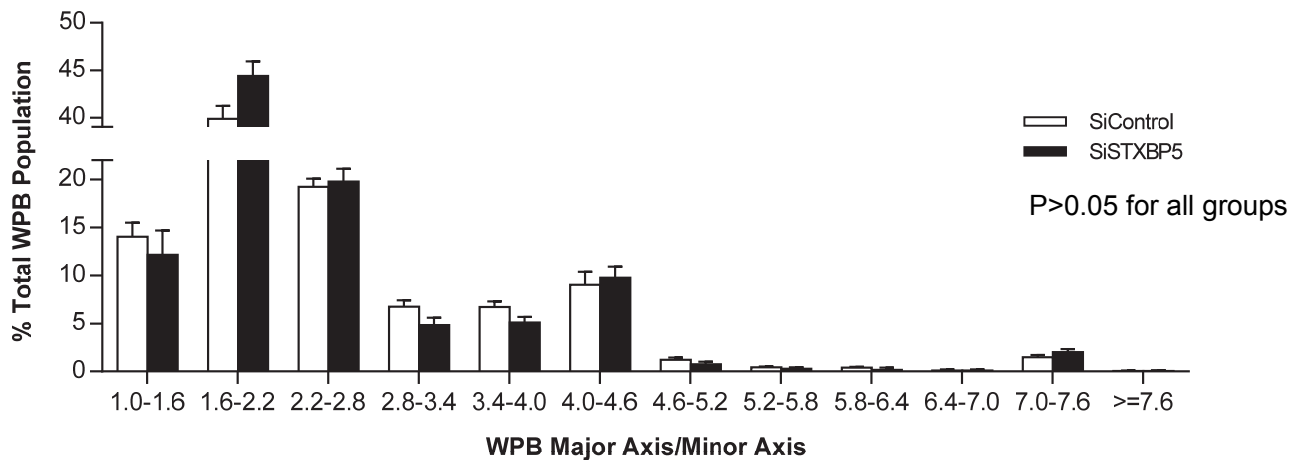

Aspect ratio: Ratio between the **major axis** and the **minor axis** of the ellipse equivalent to the object.

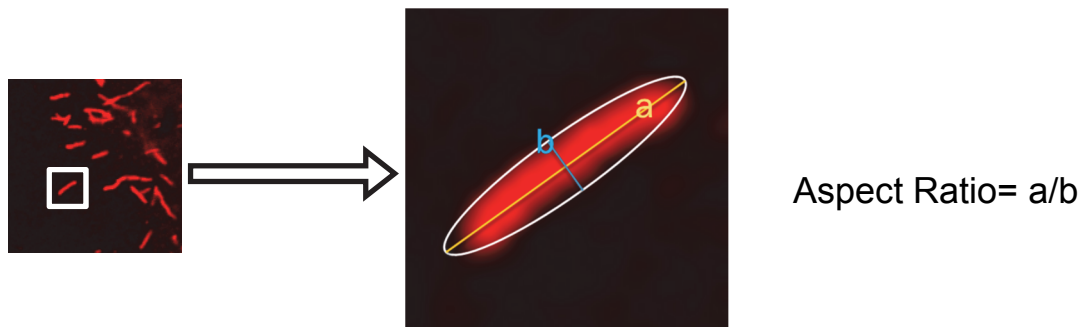

Supplemental Figure S7. Knockdown of STXBP5 does not affect the shape of WPB granules. HUVEC were transfected with siSTXBP5 or siControl. The aspect ratio of individual WPB was measured by ImagePro Plus, and its distribution was plotted as histogram (n = 3 replicate plates  $\pm$  S.D.; granules were counted in over 240 cells per plate. No significant difference between siControl and siSTXBP5). Shown at the lower panel is one representative image of WPB and one example of measurement.

## Supplemental Figure S8

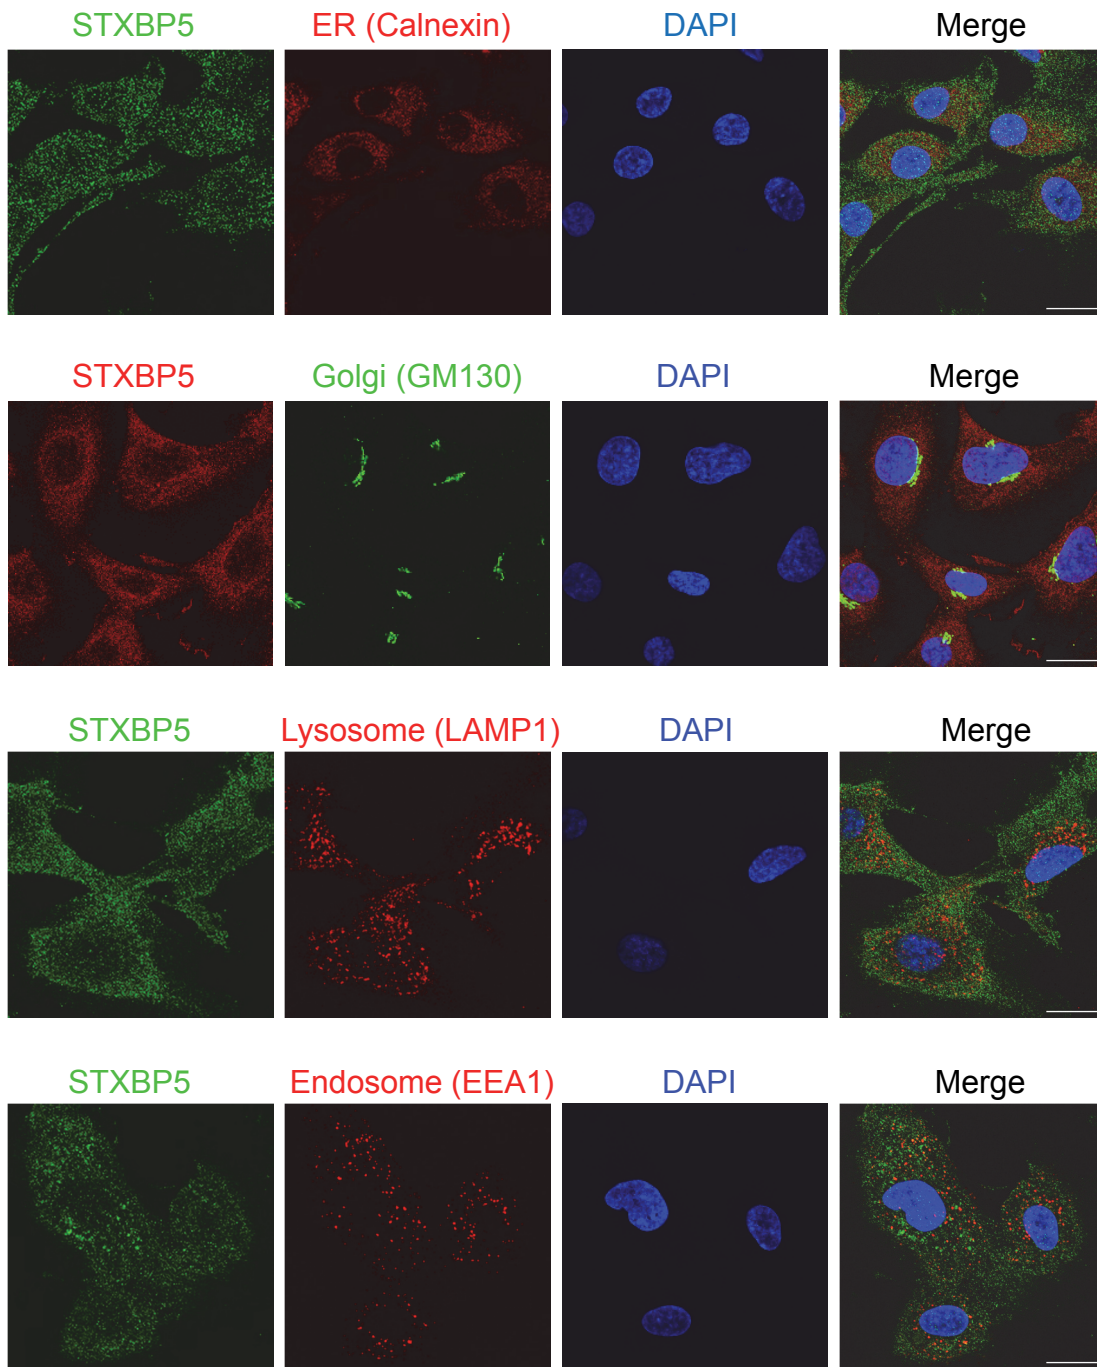

Supplemental Figure S8. STXBP5 does not co-localize with markers for ER, Golgi, lysosomes, or endosomes. Confocal microscopy was used to localize STXBP5, markers for endoplasmic reticulum, Golgi apparatus, lysosome, or early endosome. STXBP5 does not co-localize with these organelle markers. Scale bar = 20 μm.

## Supplemental Figure S9

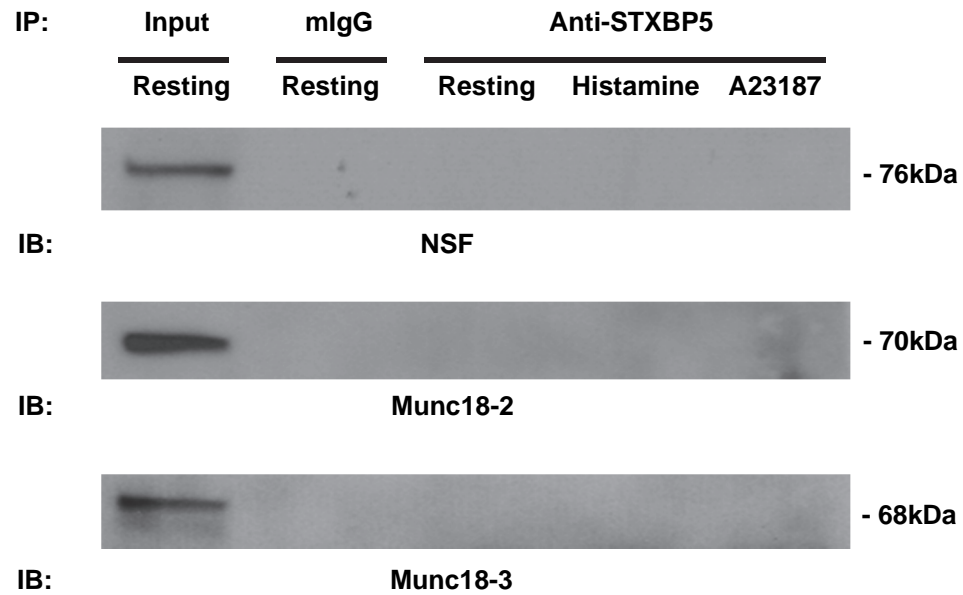

Supplemental Figure S9. STXBP5 does not interact with NSF and Munc family members. Lysates of resting or stimulated HUVEC were precipitated with antibody to STXBP5 or IgG, and precipitants were immunoblotted with antibody to NSF or Munc18-2 or Munc18-3.

## Supplemental Figure S10

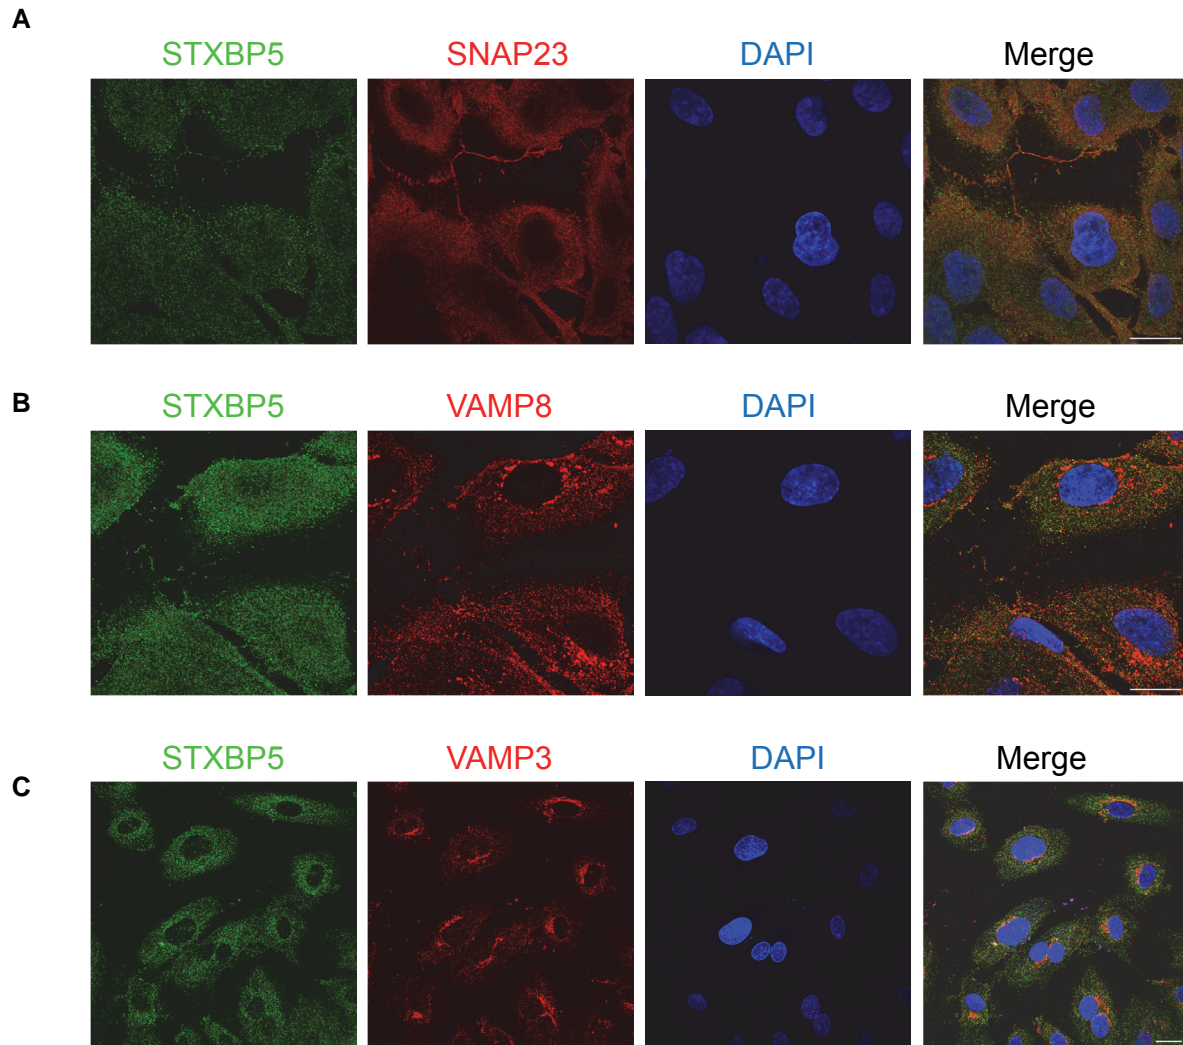

Supplemental Figure S10. STXBP5 does not co-localize with SNAP23, VAMP8, or VAMP3. Confocal microscopy was used to localize STXBP5 (green), SNAP23, VAMP8, VAMP3 (red), and DNA (blue) in HUVEC. STXBP5 does not co-localize with these SNAREs. Scale bar = 20  $\mu$ m.



## Supplemental Figure S11

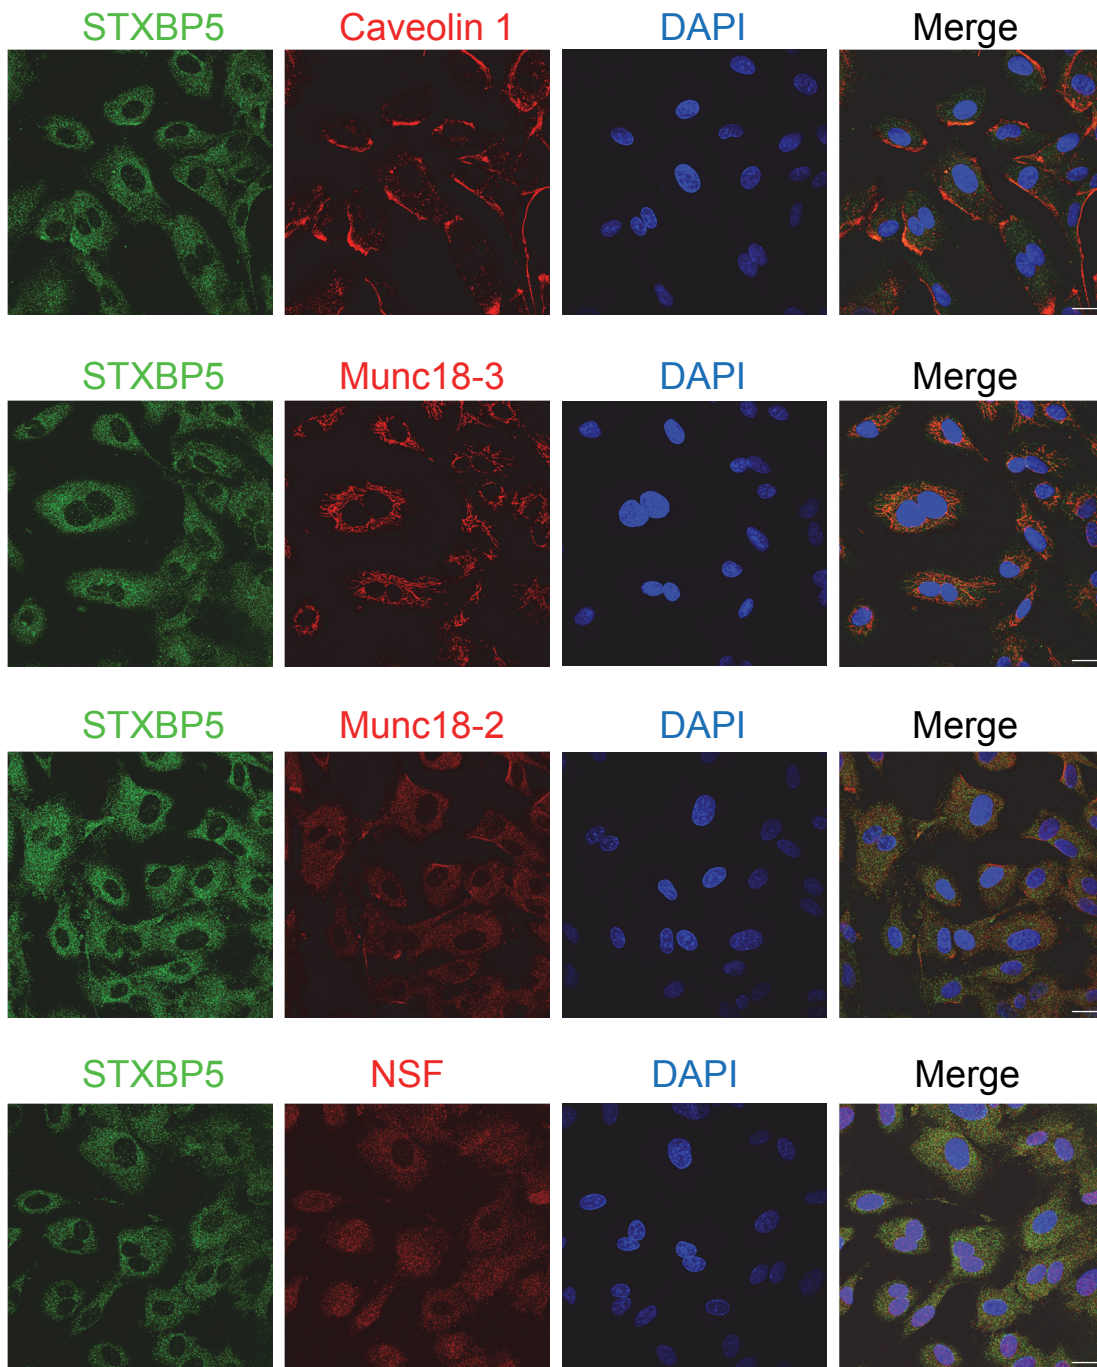

Supplemental Figure S11. STXBP5 does not co-localize with Caveolin-1, Munc18-3, Munc18-2, or NSF. Confocal microscopy was used to localize STXBP5 (green), Caveolin-1, Munc18-3, Munc18-2, NSF (red), and DNA (blue) in HUVEC. STXBP5 does not co-localize with these proteins in HUVEC. Scale bar = 20  $\mu$ m.

## Supplemental Figure S12

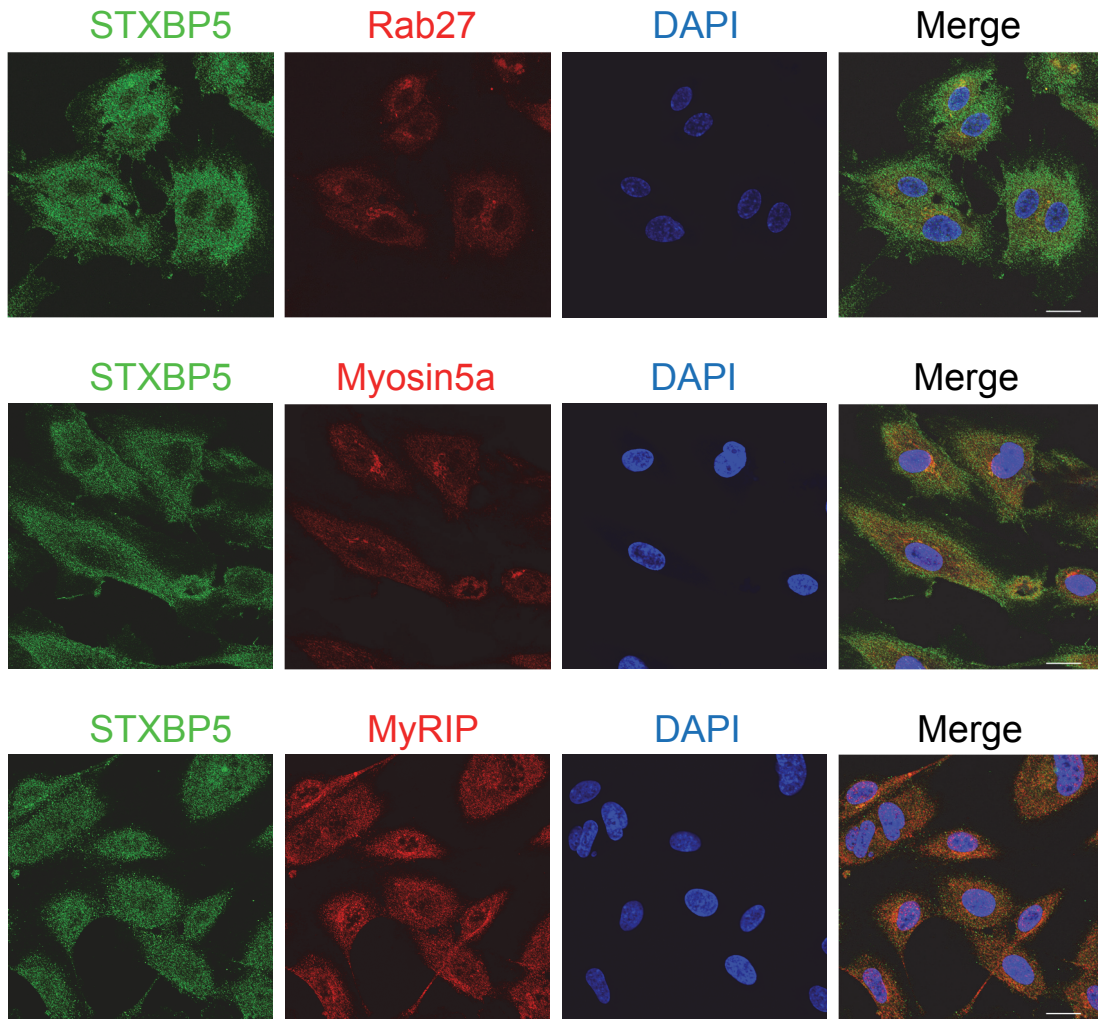

Supplemental Figure S12. STXBP5 does not co-localize with Rab27, Myosin5a or MyRIP. Confocal microscopy was used to localize STXBP5 (green), Rab27, Myosin5a, MyRIP (red), and DNA (blue) in HUVEC. STXBP5 does not co-localize with these proteins in HUVEC. Scale bar = 20  $\mu$ m.



## Supplemental Table 1. Antibodies used for this study

| Antibody Name                                                               | Species Immunized | Cat #       | Source                              |
|-----------------------------------------------------------------------------|-------------------|-------------|-------------------------------------|
| Anti-MYRIP antibody                                                         | Goat              | ab10149     | Abcam                               |
| Anti-Syntaxin 4 antibody                                                    | Rabbit            | ab96382     | Abcam                               |
| Anti-Von Willebrand Factor antibody                                         | Rabbit            | ab6994      | Abcam                               |
| FITC Anti-Mouse CD62P                                                       | Rat               | 553744      | BD Pharmingen                       |
| Purified Mouse Anti-GM130                                                   | Mouse             | 610822      | BD Transduction Laboratories        |
| Polyclonal Rabbit Anti-Caveolin                                             | Rabbit            | 610059      | BD Transduction Laboratories        |
| Purified Mouse Anti-Syntaxin 4                                              | Mouse             | 610440      | BD Transduction Laboratories        |
| Calnexin (C5C9)                                                             | Rabbit            | 2679P       | Cell Signaling                      |
| EEA1 (C45B10)                                                               | Rabbit            | 3288P       | Cell Signaling                      |
| LAMP1 (D2D11) XP®                                                           | Rabbit            | 9091P       | Cell Signaling                      |
| Integrin alphaIIb beta3 (GPIIb/IIIa, CD41/CD61), clone JON/A                | Rat               | M023-2      | Emfret                              |
| Anti - GPIIb beta derivative                                                | Rat               | X488        | Emfret                              |
| Cy3-AffiniPure Bovine Anti-Goat IgG (H+L)                                   | Bovine            | 805-165-180 | Jackson ImmunoResearch Laboratories |
| Alexa Fluor® 488 Goat Anti-Rabbit IgG (H+L) Antibody, highly cross-adsorbed | Goat              | A-11034     | Molecular Probes                    |
| Alexa Fluor® 488 Goat Anti-Mouse IgG (H+L) Antibody, highly cross-adsorbed  | Goat              | A-11029     | Molecular Probes                    |
| Alexa Fluor® 594 Goat Anti-Mouse IgG (H+L) Antibody, highly cross-adsorbed  | Goat              | A-11032     | Molecular Probes                    |
| Alexa Fluor® 594 Goat Anti-Rabbit IgG (H+L) Antibody, highly cross-adsorbed | Goat              | A-11037     | Molecular Probes                    |
| Alexa Fluor® 680 Donkey Anti-Sheep IgG (H+L)                                | Donkey            | A-21102     | Molecular Probes                    |
| Rab27a Affinity Purified Polyclonal Ab                                      | Sheep             | AF7245      | R&D Systems                         |
| Human VAMP-8 Antibody                                                       | Goat              | AF5354      | R&D Systems                         |
| Goat IgG Horseradish Peroxidase-conjugated Antibody                         | Donkey            | HAF109      | R&D Systems                         |
| Mouse IgG1 Isotype Control (Clone 11711)                                    | Mouse             | MAB002      | R&D Systems                         |
| SNAP 23 Antibody (H-50)                                                     | Rabbit            | sc-50371    | Santa Cruz                          |
| VAMP-1/2/3 Antibody (FL-118)                                                | Rabbit            | sc-13992    | Santa Cruz                          |
| Syntaxin 4 Antibody (H-16)                                                  | Goat              | sc-14455    | Santa Cruz                          |
| Tomosyn Antibody (15)                                                       | Mouse             | sc-136105   | Santa Cruz                          |
| Tomosyn Antibody (H-55)                                                     | Rabbit            | sc-98350    | Santa Cruz                          |
| NSF Antibody (H-300)                                                        | Rabbit            | sc-15339    | Santa Cruz                          |
| P-Selectin (AK4)                                                            | Mouse             | sc-19996    | Santa Cruz                          |
| β-Actin (C4)                                                                | Mouse             | sc-47778    | Santa Cruz                          |
| GAPDH (FL-335)                                                              | Rabbit            | sc-25778    | Santa Cruz                          |
| Anti-Myosin Va (LF-18) antibody                                             | Rabbit            | M4812-.2ML  | SIGMA                               |
| Syntaxin 11                                                                 | Rabbit            | 110 113     | Synaptic Systems GmbH               |
